# Supplementary material for: NBN embedded phenalenes as a new class of zigzag type polycyclic aromatic hydrocarbons for explosive detection
Source: Royal Society of Chemistry journal article supplement (doi:10.1039/d3qo01320k), 2023-01-01

# **NBN Embedded Phenalene as a New Class of Zigzag Type Polycyclic Aromatic Hydrocarbons for Explosive Detection**

Han Xu <sup>a †</sup>, Junxiong Yao <sup>a †</sup>, Wenjue Tu <sup>a</sup>, Xiaomin Zheng <sup>a</sup>, Huimin Fu <sup>a</sup>, Qixing Xu <sup>a</sup>, Shengting Zhang <sup>a</sup>, Jiaqi Li <sup>a</sup>, Hanbin Wang <sup>a</sup>, Jie Fang <sup>a</sup>, Jing Yang <sup>a</sup>, Changlong Xu\* <sup>a</sup>, Xiaohua Cao\* <sup>a</sup>, Huanan Huang\* <sup>a</sup>

College of Chemistry and Chemical Engineering; Jiangxi Province Engineering Research Center of Ecological Chemical Industry, Jiujiang Key Laboratory of Organosilicon Chemistry and Application. Jiujiang University, Jiujiang 332005, China. E-mail: huanan200890@163.com

## **Contents**

|                                                                 |           |
|-----------------------------------------------------------------|-----------|
| <b>1. General Information.....</b>                              | <b>2</b>  |
| <b>2. Computational Details.....</b>                            | <b>2</b>  |
| <b>3. Optimization of Cyclization Conditions.....</b>           | <b>2</b>  |
| <b>4. General Procedure for the Synthesis of 3a-3f.....</b>     | <b>3</b>  |
| <b>5. Characterization Data for the NBN New Compounds .....</b> | <b>4</b>  |
| <b>6. X-ray Crystallographic Studies of 3a,3f.....</b>          | <b>6</b>  |
| <b>7. Calculated UV-vis absorption for 3a, 3a' .....</b>        | <b>9</b>  |
| <b>8. Cartesian coordinates for 3a and 3a' .....</b>            | <b>9</b>  |
| <b>9. Reference.....</b>                                        | <b>13</b> |
| <b>10. Scanned NMR Spectra for the New Compounds.....</b>       | <b>13</b> |
| <b>11. Scanned mass spectrum for the New Compounds.....</b>     | <b>22</b> |

**General Information.** All operations involving air- and moisture-sensitive compounds were carried out under an atmosphere of dry argon by using a modified Schlenk line. All solvents were freshly distilled from Na or CaH<sub>2</sub>. The <sup>1</sup>H, <sup>13</sup>C, <sup>11</sup>B spectra were recorded on a 400 MHz NMR spectrometer or 500 MHz NMR spectrometer. Chemical shifts are referenced against external BF<sub>3</sub>·Et<sub>2</sub>O (<sup>11</sup>B) and tetramethylsilane (TMS). High-resolution mass spectra (HRMS) were obtained on a Varian QFT-ESI spectrometer. The UV-vis spectra were recorded on a RAYLEIGH UV-2100 spectrometer. Fluorescence spectra and quantum yield were performed on Edinburgh Instruments FS5 fluorescence spectrophotometer. Single crystals of 3a. A suitable crystal was selected and test on a SuperNova, Dual, Cu at zero, AtlasS2 diffractometer. The crystal was kept at 149.99(10) K during data collection. CCDC numbers: 2215352, 2247939 (for compounds 3a and 3f). Refinements were performed on *F*<sup>2</sup> anisotropically for all the non-hydrogen atoms by the full-matrix least-squares method. The commercially available catalysts and reagents were purchased from bidepharm.

### Computational Details

The theoretical calculations were performed via the Gaussian 16 suite of programs [16]. The structures of the complexes between 3a and TNT were fully optimized at the B3LYP-D3/6-31+G(d) level of theory. The vibrational frequencies of the optimized structure were carried out at the same level. Frequency analysis was performed to confirm that we have obtained stable structures on the potential energy surfaces. Different models were built and optimized including several hydrogen-bonded and  $\pi$ - $\pi$  stacking structures. The interaction energies of the optimized structures between 3a and TNT were calculated at the B3LYP-D3/6-311+G(d) level of theory and the basis set superposition error (BSSE) correction was also included. Natural transitional orbital (NTO) [17] analysis was performed to assess the charge transfer character of the electronic transition respect to the fluorescence quenching. NTO analysis gives two new states, the “hole” and “electron” states, correspond to the detachment and attachment of charge densities upon the electronic excitation. A quantitative scheme that evaluates the amount of transferred charge upon excitation ( $\chi$ ) and the overlap between the ground and excited charge distributions ( $\varphi_s$ ) was also used to ensuring the charge transfer character of the transitions in all the models [18]. Both  $\chi$  index and  $\varphi_s$  takes the value in the range of 0 to 1, with greater  $\chi$  values and less  $\varphi_s$  values indicating more significant charge transfer character. The NTO analysis was performed with Multiwfn software [19]. The Visual Molecular Dynamics (VMD) program [20] was used to plot the color-filled isosurfaces graphs to visualize the natural transitional orbitals.

**Table S1: Optimization of Cyclization Conditions**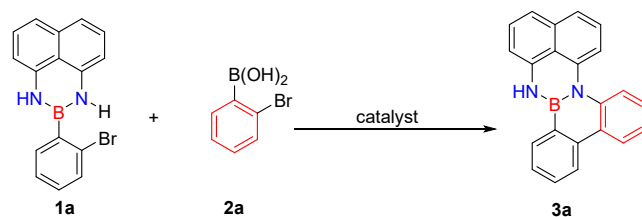

| entry | solvent                               | cat                                                | ligand             | bas                             | yield <sup>a</sup> |
|-------|---------------------------------------|----------------------------------------------------|--------------------|---------------------------------|--------------------|
| 1     | dioxane                               | PdCl <sub>2</sub> (PPh <sub>3</sub> ) <sub>2</sub> | X-Phos             | NaOAc                           | 16%                |
| 2     | dioxane                               | Pd(dba) <sub>2</sub>                               | X-Phos             | NaOAc                           | 38%                |
| 3     | dioxane                               | Pd(O <sub>2</sub> CCF <sub>3</sub> ) <sub>2</sub>  | X-Phos             | NaOAc                           | 15%                |
| 4     | dioxane                               | Pd(dppf)Cl <sub>2</sub>                            | X-Phos             | NaOAc                           | 13%                |
| 5     | dioxane                               | Pd(PPh <sub>3</sub> ) <sub>4</sub>                 | X-Phos             | NaOAc                           | 21%                |
| 6     | dioxane                               | Pd(OAc) <sub>2</sub>                               | X-Phos             | NaOAc                           | 24%                |
| 7     | dioxane                               | Pd(dba) <sub>2</sub>                               | P(Ph) <sub>3</sub> | NaOAc                           | 29%                |
| 8     | dioxane                               | Pd(dba) <sub>2</sub>                               | P(Py) <sub>3</sub> | NaOAc                           | 32%                |
| 9     | dioxane                               | Pd(dba) <sub>2</sub>                               | X-Phos             | K <sub>2</sub> CO <sub>3</sub>  | 29%                |
| 10    | dioxane                               | Pd(dba) <sub>2</sub>                               | X-Phos             | Na <sub>2</sub> CO <sub>3</sub> | 31%                |
| 11    | dioxane:H <sub>2</sub> O = 4:1        | Pd(dba) <sub>2</sub>                               | X-Phos             | NaOAc                           | 46%                |
| 12    | dioxane:H <sub>2</sub> O:EtOH = 4:1:1 | Pd(dba) <sub>2</sub>                               | X-Phos             | NaOAc                           | 73%                |
| 13    | dioxane:H <sub>2</sub> O:EtOH = 4:1:1 | Pd(PPh <sub>3</sub> ) <sub>4</sub>                 | X-Phos             | NaOAc                           | 52%                |
| 14    | dioxane:H <sub>2</sub> O:EtOH = 4:1:1 | Pd(OAc) <sub>2</sub>                               | X-Phos             | NaOAc                           | 48%                |

General procedure: 1a/2a = 1/3, 1a, 0.3 mmol, 10 mol % catalyst, 20 mol % ligand, 3 equivalents base, solvent 3 mL, 140 °C , 24 h. <sup>a</sup> Yields.

#### General Procedure for the Synthesis of compounds 1a-1f

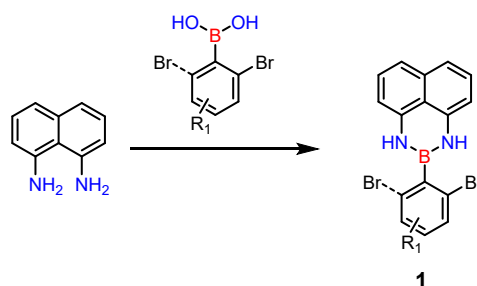

The known compounds 1a-1f were synthesized according to the literatures<sup>[21-22]</sup>. The synthesis process as follows : Under nitrogen atmosphere, a mixture of 2-bromophenylboronic acid derivatives (1 equiv. ) or 2,6-dibromophenylboronic acid (1 equiv.) and 1,8-diaminonaphthalene (1.02 equiv. ) in toluene (25 mL) were heated for 2 h under reflux with azeotropic removal of water. After evaporation of volatile material under reduced pressure, the residual solid was dissolved in CH<sub>2</sub>Cl<sub>2</sub> and subjected to silica gel column chromatography, giving the title materials 1a-1f.

## General Procedure for the Synthesis of 3a-3f

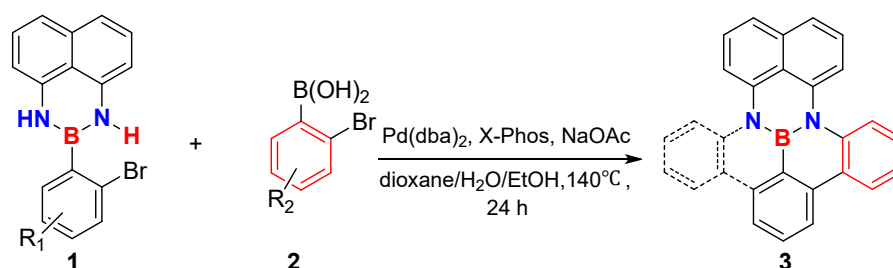

To an oven-dried schlenk tube with a stir bar was added compound 1 (0.2 mmol, 1 equiv) and compound 2 (0.6 mmol, 3 equiv), Pd(dba)<sub>2</sub> (0.02 mmol, 10 mol %), X-Phos (0.04 mmol, 20 mol %), and NaOAc (0.6 mmol, 3 equiv). The tube was sealed with schlenk system, evacuated under vacuum, and purged with Ar three times. Dioxane-H<sub>2</sub>O-EtOH (total mix solvent 2 mL, dioxane: H<sub>2</sub>O: EtOH = 4:1:1) was added, the resulting mixture was heated to 140 °C and stirred 24 h. The reaction mixture was cooled to rt, and filtered over Celite. The solvent was removed in vacuo, and the product was purified by flash column chromatography on silica gel with hexanes and dichloromethane as the eluent. The polarity of the eluent was respectively as follow: 3a, petroleum ether : dichloromethane = 5:1; 3b, petroleum ether : dichloromethane = 5:1; 3c, petroleum ether : dichloromethane = 4:1; 3d, petroleum ether : dichloromethane = 4:1; 3e, petroleum ether : dichloromethane = 4:1; 3f, petroleum ether : dichloromethane = 5:1. The reactions were set up with 0.2 mmol compound 1, and the final product masses were: 3a: 31 mg, 3b: 24 mg, 3c: 22.4 mg, 3d: 23 mg, 3f: 20 mg, 3g: 17 mg.

## Characterization Data for the New Compounds

The carbon attached to the boron atom is no signal response in the NMR spectrum.

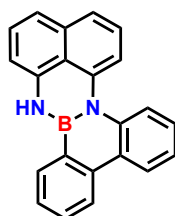

### 7H-dibenzo[3,4:5,6][1,2]azaborinino[1,2-a]naphtho[1,8-de][1,3,2]diazaborinine (3a)

<sup>1</sup>H NMR (500 MHz, CDCl<sub>3</sub>): δ 8.37 (1H, dd, *J* = 8.4, 1.3 Hz), 8.20 (1H, d, *J* = 7.9 Hz), 8.13 (1H, dd, *J* = 8.0, 1.7 Hz), 7.78 (1H, dd, *J* = 7.5, 1.4 Hz), 7.67-7.58 (2H, m), 7.41 (1H, t, *J* = 7.4, 1.0 Hz), 7.29-7.13 (6H, m), 6.54 (1H, dd, *J* = 7.0, 1.3 Hz), 6.35 (1H, s). <sup>11</sup>B NMR (CDCl<sub>3</sub>, 160 MHz): δ 27.83. <sup>13</sup>C NMR (126 MHz, CDCl<sub>3</sub>): δ 139.50, 139.20, 138.30, 136.40, 131.41, 130.16, 127.22, 126.71, 126.68, 126.52, 126.23, 125.75, 122.72, 122.44, 122.30, 120.75, 118.40, 117.01, 111.68, 106.79. The carbon attaching to boron were not observed. HR-MS (ESI): calcd. for [M+H]<sup>+</sup>: Calcd. for C<sub>22</sub>H<sub>15</sub>BN<sub>2</sub>: 319.1407; Found: 319.1408.

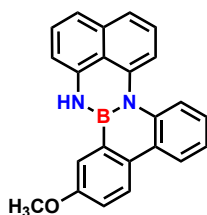

**10-methoxy-7H-dibenzo[3,4:5,6][1,2]azaborinino[1,2-a]naphtho[1,8-de][1,3,2]diazaborinine (3b)**

$^1\text{H}$  NMR (400 MHz,  $\text{CDCl}_3$ ):  $\delta$  8.38 (1H, d,  $J = 9.6$  Hz), 8.17 (1H, d,  $J = 9.6$  Hz), 8.08 (d,  $J = 7.5$  Hz, 1H), 7.64 (1H, dd,  $J = 5.8, 3.0$  Hz), 7.40-7.07 (8H, m), 6.59 (1H, d,  $J = 7.0$  Hz), 6.36 (s, 1H), 3.94 (s, 3H).  $^{11}\text{B}$  NMR ( $\text{CDCl}_3$ , 160 MHz):  $\delta$  28.32.  $^{13}\text{C}$  NMR (101 MHz,  $\text{CDCl}_3$ ):  $\delta$  158.31, 139.14, 138.34, 137.43, 136.37, 132.79, 127.17, 126.61, 126.24, 125.68, 125.13, 124.48, 122.45, 122.30, 120.66, 118.70, 118.42, 116.94, 113.18, 111.76, 106.71, 55.51. The carbon attaching to boron were not observed. HR-MS (ESI): calcd. for  $[\text{M}]^+$ : Calcd. For  $\text{C}_{23}\text{H}_{17}\text{BN}_2\text{O}$ : 348.1434; Found: 348.1436.

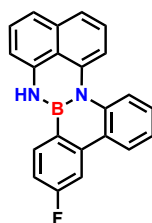

**11-fluoro-7H-dibenzo[3,4:5,6][1,2]azaborinino[1,2-a]naphtho[1,8-de][1,3,2]diazaborinine (3c)**

$^1\text{H}$  NMR (400 MHz,  $\text{CDCl}_3$ ):  $\delta$  8.39 (1H, d,  $J = 8.5$  Hz), 8.05 (d,  $J = 8.0$  Hz, 1H), 7.94-7.73 (m, 2H), 7.62 (d,  $J = 7.1$  Hz, 1H), 7.42-7.07 (m, 7H), 6.58 (d,  $J = 6.9$  Hz, 1H), 6.33 (1H, s).  $^{11}\text{B}$  NMR ( $\text{CDCl}_3$ , 160 MHz):  $\delta$  28.10.  $^{13}\text{C}$  NMR (101 MHz,  $\text{CDCl}_3$ ):  $\delta$  166.57 ( $J_{\text{C-F}} = 257.55$  Hz, CF), 142.12, 138.97, 138.67, 138.03, 136.34, 132.59 ( $J_{\text{C-F}} = 9.09$  Hz, CH), 127.36, 127.22, 126.19, 125.81, 125.74, 122.50, 122.16, 120.93, 118.51, 117.10, 114.44 ( $J_{\text{C-F}} = 21.21$  Hz, CH), 111.72, 109.24 ( $J_{\text{C-F}} = 21.21$  Hz, CH), 106.85. The carbon attaching to boron were not observed. HR-MS (ESI): calcd. for  $[\text{M}+\text{H}]^+$ : Calcd. For  $\text{C}_{24}\text{H}_{14}\text{BFN}_2$ : 337.1312; Found: 337.1303.

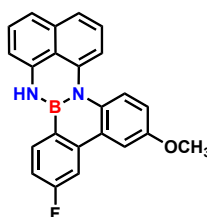

**11-fluoro-14-methoxy-7H-dibenzo[3,4:5,6][1,2]azaborinino[1,2-a]naphtho[1,8-de][1,3,2]diazaborinine (3d)**

$^1\text{H}$  NMR (400 MHz,  $\text{CDCl}_3$ ):  $\delta$  8.31 (1H, d,  $J = 9.2$  Hz), 7.88-7.73 (2H, m), 7.55 (1H, t,  $J = 4.4$  Hz), 7.50 (1H, d,  $J = 2.9$  Hz), 7.35-7.10 (5H, m), 6.88 (1H, dd,  $J = 9.2, 2.9$  Hz), 6.55 (1H, d,  $J = 7.0$  Hz), 6.30 (1H, s), 3.91 (3H, s).  $^{11}\text{B}$  NMR ( $\text{CDCl}_3$ , 160 MHz):  $\delta$  28.67.  $^{13}\text{C}$  NMR (101 MHz,  $\text{CDCl}_3$ ):  $\delta$  166.49 ( $J_{\text{C-F}} = 249.47$  Hz, CF), 154.79, 141.97 ( $J_{\text{C-F}} = 8.08$  Hz, CH), 139.15, 138.47, 136.40, 132.67 ( $J_{\text{C-F}} = 9.09$  Hz, CH), 132.44, 127.22, 126.81, 126.27, 122.10, 120.48, 118.38, 118.35, 114.57 ( $J_{\text{C-F}} = 21.21$  Hz, CH), 113.93, 111.02, 109.67, 109.32 ( $J_{\text{C-F}} = 22.22$  Hz, CH), 106.67, 55.70. The carbon attaching to

boron were not observed. HR-MS (ESI): calcd. for  $[M+H]^+$ : Calcd. for  $C_{23}H_{16}BFN_2O$ : 367.1418; Found: 367.1411.

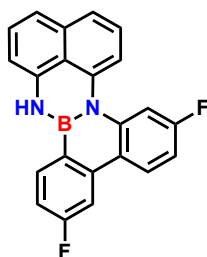

**11,15-difluoro-7H-dibenzo[3,4:5,6][1,2]azaborinino[1,2-a]naphtho[1,8-de][1,3,2]diazaborinine (3e)**

$^1H$  NMR (400 MHz,  $CDCl_3$ ):  $\delta$  8.10 (1H, dd,  $J = 12.2, 2.6$  Hz), 7.99 (1H, dd,  $J = 8.9, 6.5$  Hz), 7.86-7.73 (2H, m), 7.59 (1H, d,  $J = 7.3$  Hz), 7.36-7.21 (4H, m), 7.15 (1H, td,  $J = 8.4, 2.3$  Hz), 6.92 (1H, ddd,  $J = 9.4, 7.3, 2.6$  Hz), 6.66-6.53 (m, 1H), 6.33 (s, 1H).  $^{11}B$  NMR ( $CDCl_3$ , 160 MHz):  $\delta$  28.73.  $^{13}C$  NMR (101 MHz,  $CDCl_3$ ):  $\delta$  166.63 ( $J_{C-F} = 250.48$  Hz, CF), 163.26 ( $J_{C-F} = 246.44$  Hz, CF), 141.69 ( $J_{C-F} = 8.08$  Hz), 140.29 ( $J_{C-F} = 10.1$  Hz), 138.56, 137.49, 136.27, 132.66 ( $J_{C-F} = 9.09$  Hz), 127.55 ( $J_{C-F} = 10.1$  Hz), 127.28, 126.21, 122.20, 121.98, 121.49, 118.74, 114.29 ( $J_{C-F} = 22.22$  Hz), 111.89, 110.02 ( $J_{C-F} = 22.22$  Hz), 109.07 ( $J_{C-F} = 22.22$  Hz), 107.14, 103.98 ( $J_{C-F} = 27.27$  Hz). The carbon attaching to boron were not observed. HR-MS (ESI): calcd. for  $[M+H]^+$ : Calcd. for  $C_{22}H_{12}BF_2N_2$ : 354.1140; Found: 354.1144.

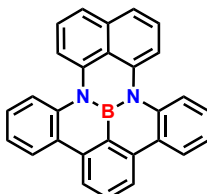

**3b,14b-diaza-3b1-boratribenzo[a,cd,f]perylene (3f)**

$^1H$  NMR (500 MHz,  $CDCl_3$ ):  $\delta$  8.37-8.33 (4H, m), 8.23 (2H, d,  $J = 7.9$  Hz), 7.89-7.85 (1H, m), 7.75 (2H, d,  $J = 7.0$  Hz), 7.45-7.33 (4H, m), 7.30-7.28 (2H, m).  $^{11}B$  NMR (160 MHz,  $CDCl_3$ ):  $\delta$  28.02.  $^{13}C$  NMR (126 MHz,  $CDCl_3$ ):  $\delta$  138.60, 138.54, 135.92, 135.77, 131.93, 127.19, 126.22, 125.64, 125.48, 125.33, 122.47, 120.87, 119.64, 115.91, 113.26. The carbon attaching to boron were not observed. HR-MS (ESI): calcd. for  $[M+H]^+$ : Calcd. for  $C_{28}H_{17}BN_2$ : 392.1485; Found: 392.1485.

**X-ray Crystallographic Studies of 3a**

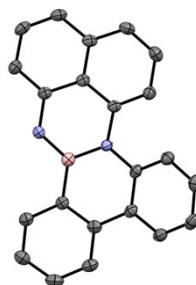

**Table S2** Crystal data and structure refinement for Compound 3a.

|                     |    |
|---------------------|----|
| Identification code | 3a |
|---------------------|----|

|                                                   |                                                               |
|---------------------------------------------------|---------------------------------------------------------------|
| <b>Empirical formula</b>                          | C <sub>22</sub> H <sub>15</sub> BN <sub>2</sub>               |
| <b>Formula weight</b>                             | 318.17                                                        |
| <b>Temperature/K</b>                              | 149.99(10)                                                    |
| <b>Crystal system</b>                             | monoclinic                                                    |
| <b>Space group</b>                                | P2 <sub>1</sub> /c                                            |
| <b>a/Å</b>                                        | 12.5564(11)                                                   |
| <b>b/Å</b>                                        | 11.0122(7)                                                    |
| <b>c/Å</b>                                        | 12.4231(12)                                                   |
| <b>α/°</b>                                        | 90                                                            |
| <b>β/°</b>                                        | 117.687(11)                                                   |
| <b>γ/°</b>                                        | 90                                                            |
| <b>Volume/Å<sup>3</sup></b>                       | 1521.1(3)                                                     |
| <b>Z</b>                                          | 4                                                             |
| <b>ρ<sub>calc</sub>/cm<sup>3</sup></b>            | 1.389                                                         |
| <b>μ/mm<sup>-1</sup></b>                          | 0.081                                                         |
| <b>F(000)</b>                                     | 664.0                                                         |
| <b>Crystal size/mm<sup>3</sup></b>                | 0.13 × 0.11 × 0.09                                            |
| <b>Radiation</b>                                  | Mo Kα (λ = 0.71073)                                           |
| <b>2θ range for data collection/°</b>             | 5.206 to 49.994                                               |
| <b>Index ranges</b>                               | -14 ≤ h ≤ 12, -13 ≤ k ≤ 13, -14 ≤ l ≤ 14                      |
| <b>Reflections collected</b>                      | 6200                                                          |
| <b>Independent reflections</b>                    | 2677 [R <sub>int</sub> = 0.0301, R <sub>sigma</sub> = 0.0440] |
| <b>Data/restraints/parameters</b>                 | 2677/0/230                                                    |
| <b>Goodness-of-fit on F<sup>2</sup></b>           | 1.045                                                         |
| <b>Final R indexes [I ≥ 2σ (I)]</b>               | R <sub>1</sub> = 0.0441, wR <sub>2</sub> = 0.0991             |
| <b>Final R indexes [all data]</b>                 | R <sub>1</sub> = 0.0577, wR <sub>2</sub> = 0.1081             |
| <b>Largest diff. peak/hole / e Å<sup>-3</sup></b> | 0.17/-0.22                                                    |

### X-ray Crystallographic Studies of 3f

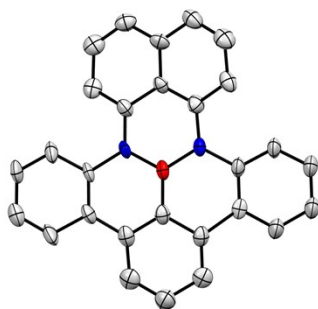

Table S3 Crystal data and structure refinement for Compound 3f.

|                                                   |                                                           |
|---------------------------------------------------|-----------------------------------------------------------|
| <b>Identification code</b>                        | 3f                                                        |
| <b>Empirical formula</b>                          | C <sub>28</sub> H <sub>17</sub> BN <sub>2</sub>           |
| <b>Formula weight</b>                             | 392.25                                                    |
| <b>Temperature/K</b>                              | 169.99(10)                                                |
| <b>Crystal system</b>                             | monoclinic                                                |
| <b>Space group</b>                                | P2 <sub>1</sub>                                           |
| <b>a/Å</b>                                        | 32.664(3)                                                 |
| <b>b/Å</b>                                        | 7.5997(4)                                                 |
| <b>c/Å</b>                                        | 23.6427(19)                                               |
| <b>α/°</b>                                        | 90                                                        |
| <b>β/°</b>                                        | 108.644(9)                                                |
| <b>γ/°</b>                                        | 90                                                        |
| <b>Volume/Å<sup>3</sup></b>                       | 5561.0(8)                                                 |
| <b>Z</b>                                          | 12                                                        |
| <b>ρ<sub>calc</sub>/cm<sup>3</sup></b>            | 1.406                                                     |
| <b>μ/mm<sup>-1</sup></b>                          | 0.629                                                     |
| <b>F(000)</b>                                     | 2448.0                                                    |
| <b>Crystal size/mm<sup>3</sup></b>                | 0.15 × 0.13 × 0.1                                         |
| <b>Radiation</b>                                  | Cu Kα (λ = 1.54184)                                       |
| <b>2θ range for data collection/°</b>             | 5.71 to 133.198                                           |
| <b>Index ranges</b>                               | -38 ≤ h ≤ 38, -9 ≤ k ≤ 9, -28 ≤ l ≤ 28                    |
| <b>Reflections collected</b>                      | 11539                                                     |
| <b>Independent reflections</b>                    | 11539 [R <sub>int</sub> = ?, R <sub>sigma</sub> = 0.1599] |
| <b>Data/restraints/parameters</b>                 | 11539/1765/1676                                           |
| <b>Goodness-of-fit on F<sup>2</sup></b>           | 0.928                                                     |
| <b>Final R indexes [I ≥ 2σ(I)]</b>                | R <sub>1</sub> = 0.0951, wR <sub>2</sub> = 0.2391         |
| <b>Final R indexes [all data]</b>                 | R <sub>1</sub> = 0.1686, wR <sub>2</sub> = 0.2793         |
| <b>Largest diff. peak/hole / e Å<sup>-3</sup></b> | 0.62/-0.40                                                |
| <b>Flack parameter</b>                            | 1.6(10)                                                   |



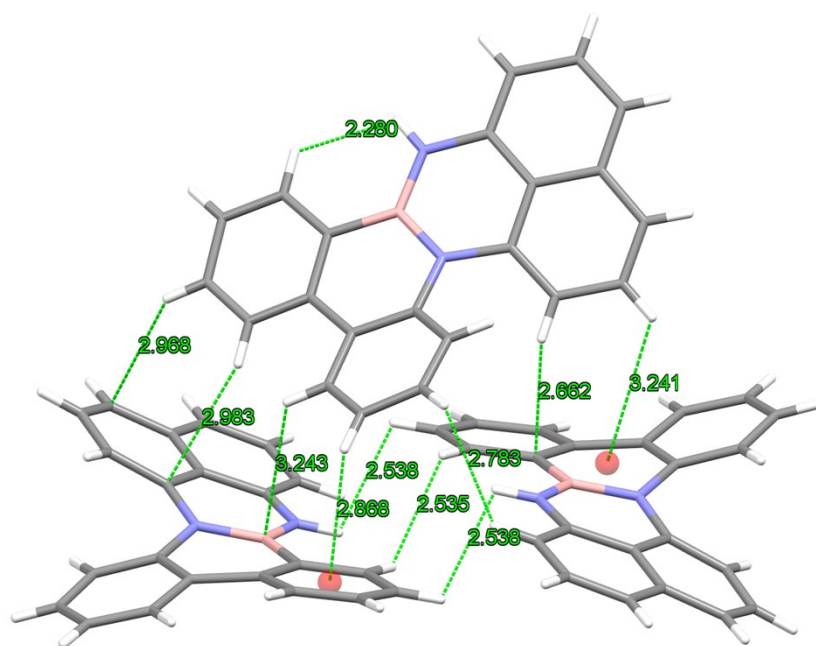

Figure S1. Intermolecular interactions for 3a.

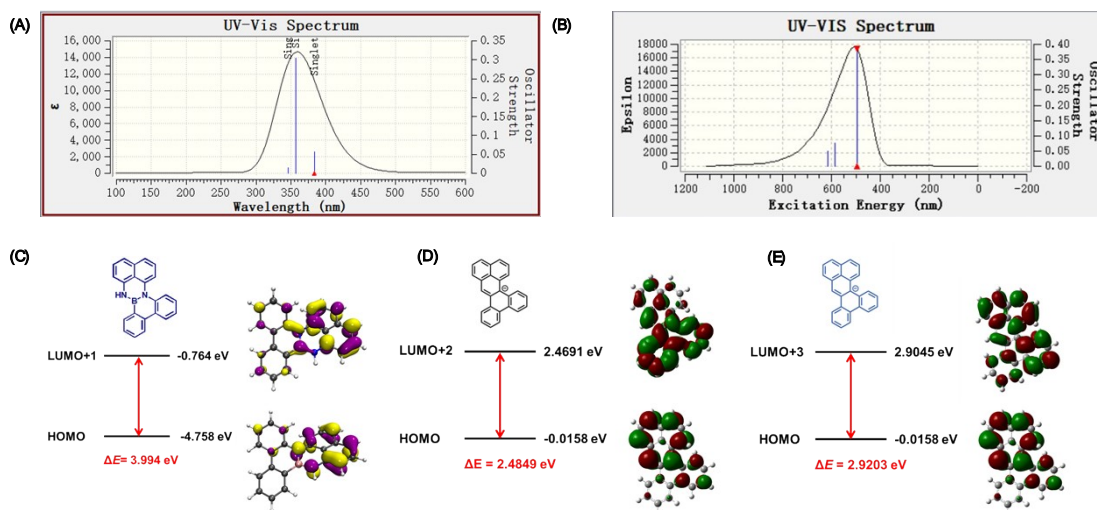

Figure S2. Calculated UV-vis absorption for 3a (A), 3a' (B), (C-D) Frontier orbitals energies and diagrams for 3a (C), 3a' (D).

Table S4. Cartesian coordinates for 3a

| Center Number | Atomic Number | Atomic Type | Coordinates (Angstroms) |           |           |
|---------------|---------------|-------------|-------------------------|-----------|-----------|
|               |               |             | X                       | Y         | Z         |
| 1             | 6             | 0           | 4.479829                | -1.927591 | 0.666653  |
| 2             | 6             | 0           | 3.140115                | -2.349452 | 0.785703  |
| 3             | 6             | 0           | 2.108016                | -1.493159 | 0.437664  |
| 4             | 6             | 0           | 2.385313                | -0.164712 | -0.008322 |
| 5             | 6             | 0           | 3.750947                | 0.224254  | -0.195658 |
| 6             | 6             | 0           | 4.784825                | -0.678613 | 0.174837  |

|    |   |   |           |           |           |
|----|---|---|-----------|-----------|-----------|
| 7  | 6 | 0 | 1.330745  | 0.754066  | -0.325183 |
| 8  | 6 | 0 | 1.653163  | 1.939143  | -0.973792 |
| 9  | 6 | 0 | 2.999051  | 2.298835  | -1.191390 |
| 10 | 6 | 0 | 4.030348  | 1.487337  | -0.778645 |
| 11 | 7 | 0 | 0.775493  | -1.898585 | 0.433913  |
| 12 | 7 | 0 | -0.007552 | 0.379376  | -0.007102 |
| 13 | 5 | 0 | -0.312490 | -1.022901 | 0.177100  |
| 14 | 6 | 0 | -1.774675 | -1.485574 | 0.001734  |
| 15 | 6 | 0 | -2.132512 | -2.837995 | -0.144964 |
| 16 | 6 | 0 | -3.432659 | -3.217481 | -0.453361 |
| 17 | 6 | 0 | -4.403834 | -2.227436 | -0.643564 |
| 18 | 6 | 0 | -4.076852 | -0.884733 | -0.502203 |
| 19 | 6 | 0 | -2.768823 | -0.489848 | -0.157659 |
| 20 | 6 | 0 | -1.047479 | 1.325988  | 0.194215  |
| 21 | 6 | 0 | -2.408434 | 0.918372  | 0.092024  |
| 22 | 6 | 0 | -3.407040 | 1.883818  | 0.326172  |
| 23 | 6 | 0 | -3.111711 | 3.194242  | 0.670607  |
| 24 | 6 | 0 | -1.775303 | 3.565875  | 0.831029  |
| 25 | 6 | 0 | -0.763958 | 2.642620  | 0.604342  |
| 26 | 1 | 0 | 5.276085  | -2.612993 | 0.944837  |
| 27 | 1 | 0 | 2.911176  | -3.356402 | 1.126798  |
| 28 | 1 | 0 | 5.818529  | -0.370275 | 0.044823  |
| 29 | 1 | 0 | 0.868554  | 2.604121  | -1.311503 |
| 30 | 1 | 0 | 3.212376  | 3.243352  | -1.685047 |
| 31 | 1 | 0 | 5.065735  | 1.785020  | -0.920447 |
| 32 | 1 | 0 | 0.621844  | -2.882565 | 0.609682  |
| 33 | 1 | 0 | -1.373864 | -3.611259 | -0.038229 |
| 34 | 1 | 0 | -3.689753 | -4.267339 | -0.564052 |
| 35 | 1 | 0 | -5.419744 | -2.506517 | -0.911143 |
| 36 | 1 | 0 | -4.846234 | -0.140610 | -0.679010 |
| 37 | 1 | 0 | -4.447781 | 1.583233  | 0.276565  |
| 38 | 1 | 0 | -3.912305 | 3.906751  | 0.846422  |
| 39 | 1 | 0 | -1.516067 | 4.570879  | 1.152836  |
| 40 | 1 | 0 | 0.263868  | 2.935851  | 0.772842  |
| 41 | 0 | 0 | -2.107764 | 1.988773  | 1.416679  |
| 42 | 0 | 0 | -3.324474 | -1.906315 | 0.656160  |
| 43 | 0 | 0 | -1.444652 | -0.101393 | 1.047604  |
| 44 | 0 | 0 | 1.048657  | -0.316161 | 1.084112  |
| 45 | 0 | 0 | 2.719333  | 1.522260  | 0.322405  |
| 46 | 0 | 0 | 3.431144  | -0.711334 | 1.245506  |

---

**Table S5.** Cartesian coordinates for 3a'

| Center<br>Number | Atomic<br>Number | Atomic<br>Type | Coordinates (Angstroms) |           |           |
|------------------|------------------|----------------|-------------------------|-----------|-----------|
|                  |                  |                | X                       | Y         | Z         |
| 1                | 6                | 0              | -4.484227               | -1.976131 | -0.584566 |
| 2                | 6                | 0              | -3.153541               | -2.381104 | -0.670865 |
| 3                | 6                | 0              | -2.101594               | -1.482141 | -0.370385 |
| 4                | 6                | 0              | -2.412748               | -0.137055 | 0.003949  |
| 5                | 6                | 0              | -3.784192               | 0.250184  | 0.145500  |
| 6                | 6                | 0              | -4.802797               | -0.686776 | -0.174135 |
| 7                | 6                | 0              | -1.358150               | 0.794755  | 0.260592  |
| 8                | 6                | 0              | -1.722648               | 2.046014  | 0.814761  |
| 9                | 6                | 0              | -3.060290               | 2.409055  | 0.986076  |
| 10               | 6                | 0              | -4.084940               | 1.548029  | 0.623052  |
| 11               | 6                | 0              | -0.751370               | -1.887891 | -0.354856 |
| 12               | 6                | 0              | 0.017397                | 0.394104  | 0.020617  |
| 13               | 6                | 0              | 0.301445                | -0.994239 | -0.115115 |
| 14               | 6                | 0              | 1.685300                | -1.466786 | 0.029853  |
| 15               | 6                | 0              | 1.984609                | -2.841037 | 0.151548  |
| 16               | 6                | 0              | 3.274736                | -3.287044 | 0.383984  |
| 17               | 6                | 0              | 4.315899                | -2.359694 | 0.520493  |
| 18               | 6                | 0              | 4.047424                | -1.006598 | 0.404416  |
| 19               | 6                | 0              | 2.745075                | -0.529517 | 0.141903  |
| 20               | 6                | 0              | 1.113212                | 1.342575  | -0.148495 |
| 21               | 6                | 0              | 2.465211                | 0.892426  | -0.065126 |
| 22               | 6                | 0              | 3.505795                | 1.825687  | -0.249258 |
| 23               | 6                | 0              | 3.253654                | 3.155636  | -0.543563 |
| 24               | 6                | 0              | 1.930637                | 3.584723  | -0.707323 |
| 25               | 6                | 0              | 0.889250                | 2.692033  | -0.522120 |

|    |   |   |           |           |           |
|----|---|---|-----------|-----------|-----------|
| 26 | 1 | 0 | -5.278165 | -2.679001 | -0.822580 |
| 27 | 1 | 0 | -2.907651 | -3.400111 | -0.958612 |
| 28 | 1 | 0 | -5.841687 | -0.380660 | -0.082161 |
| 29 | 1 | 0 | -0.951743 | 2.723761  | 1.158768  |
| 30 | 1 | 0 | -3.294469 | 3.379572  | 1.415591  |
| 31 | 1 | 0 | -5.124694 | 1.843963  | 0.736442  |
| 32 | 1 | 0 | -0.541756 | -2.931566 | -0.560548 |
| 33 | 1 | 0 | 1.187486  | -3.573572 | 0.099025  |
| 34 | 1 | 0 | 3.470550  | -4.351356 | 0.481100  |
| 35 | 1 | 0 | 5.328330  | -2.696277 | 0.726067  |
| 36 | 1 | 0 | 4.862099  | -0.303319 | 0.535410  |
| 37 | 1 | 0 | 4.536929  | 1.494692  | -0.200708 |
| 38 | 1 | 0 | 4.079872  | 3.846443  | -0.687004 |
| 39 | 1 | 0 | 1.717220  | 4.607823  | -1.004809 |
| 40 | 1 | 0 | -0.121184 | 3.024362  | -0.721597 |

**Table S6.** The amount of transferred charge ( $\chi$ ) and the overlap ( $\varphi_s$ ) between the hole and electron states for the first electronic transitions of the four models.

| $\leftarrow$                | (a) $\pi$ - $\pi$ stacking (dimer) $\leftarrow$                                     | (b) hydrogen-bonding (dimer) $\leftarrow$                                |
|-----------------------------|-------------------------------------------------------------------------------------|--------------------------------------------------------------------------|
| $\chi^{\leftarrow}$         | 0.97392 $\leftarrow$                                                                | — $\leftarrow$                                                           |
| $\varphi_s^{\leftarrow}$    | 0.02773 $\leftarrow$                                                                | — $\leftarrow$                                                           |
| Geometry $\leftarrow$       | 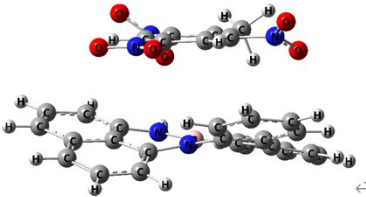 | The dimer hydrogen bond configuration could not be obtained $\leftarrow$ |
| Binding Energy $\leftarrow$ | -20.85 kcal/mol $\leftarrow$                                                        | — $\leftarrow$                                                           |

|                | (a) $\pi$ - $\pi$ stacking (trimer)                                               | (b) hydrogen-bonding (trimer)                                                      |
|----------------|-----------------------------------------------------------------------------------|------------------------------------------------------------------------------------|
| $\chi$         | 0.95129                                                                           | 0.98625                                                                            |
| $\varphi_s$    | 0.02853                                                                           | 0.00833                                                                            |
| Geometry       | 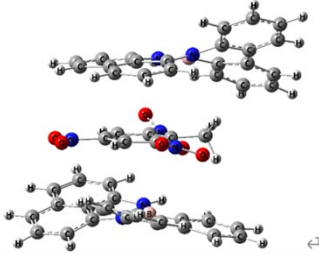 |  |
| Binding Energy | -42.59 kcal/mol                                                                   | -31.15 kcal/mol                                                                    |

#### Reference:

- [11] M. J. Frisch, G. W. Trucks, H. B. G. E. Schlegel, M. Robb, J. R. Cheeseman, D. J. Fox, Gaussian 16 Revision. A.03, Gaussian Inc., Wallingford, CT, **2016**.
- [2] R. L. Martin, *J. Chem. Phys.* **2003**, *118*, 4775.
- [3] T. Etienne, X. Assfeld, A. Monari, *J. Chem. Theory Comput.* **2014**, *10*, 3896.
- [4] T. Lu, F. W. Chen, *J. Comput. Chem.*, **2012**, *33*, 580-592.
- [5] W. Humphrey, A. Dalke, K. Schulten, *J Mol Graph Model*, **1996**, *14*, 33-38.
- [6] C. W. Ju, B. Li, L. Li, L. H. Li, W. G. Yan, C. M. Cui, X. N. Ma, D. B. Zhao, *J. Am. Chem. Soc.*, **2021**, *143*, 5903-5916.
- [7] H. Noguchi, K. Hojo, M. Suginome, *J. Am. Chem. Soc.* **2007**, *129*, 758-759.

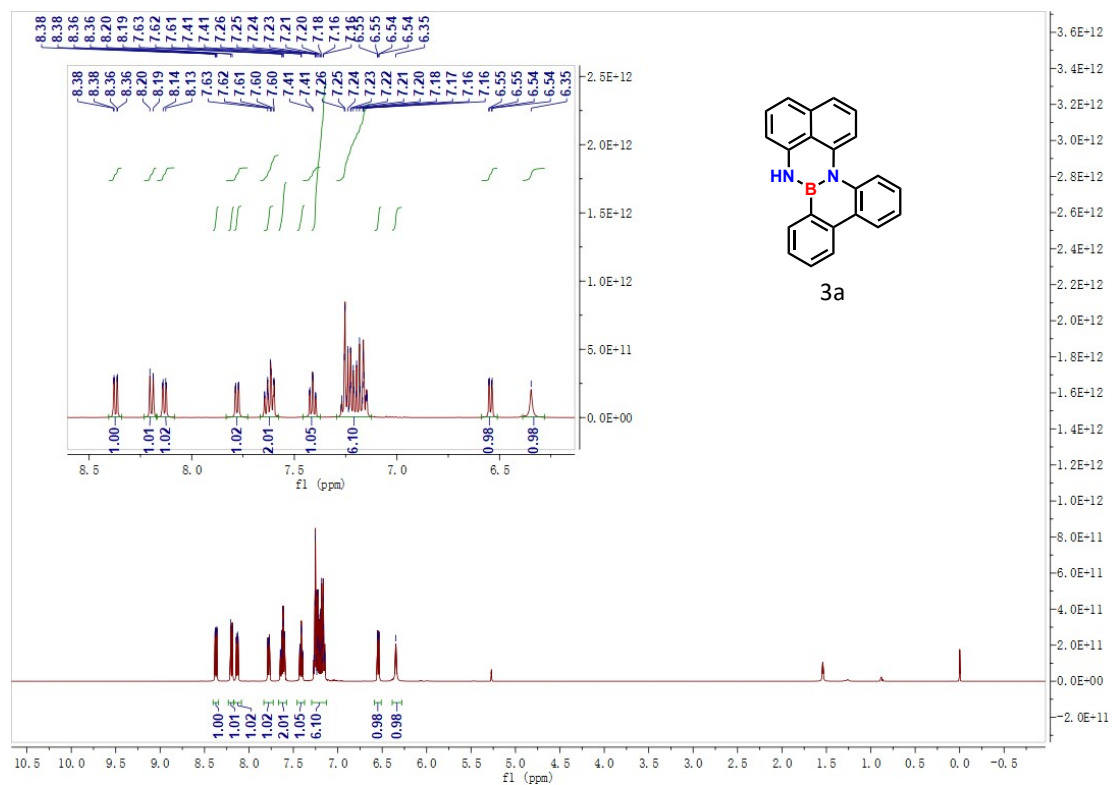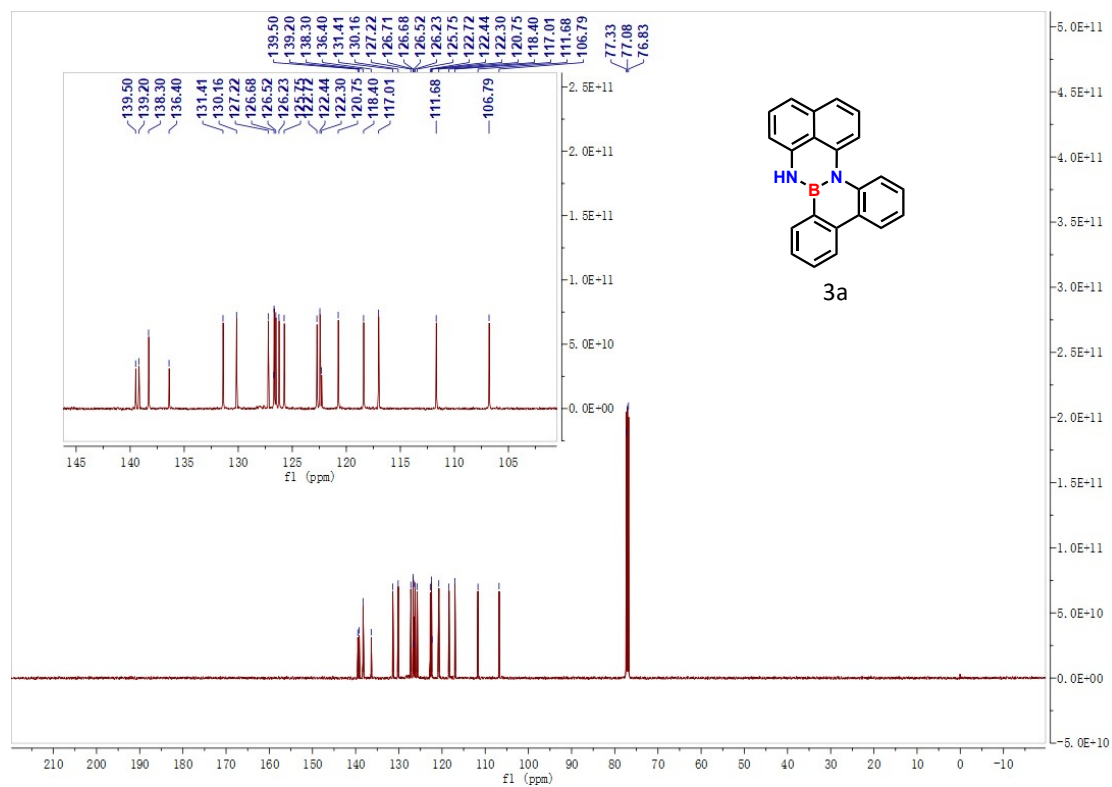

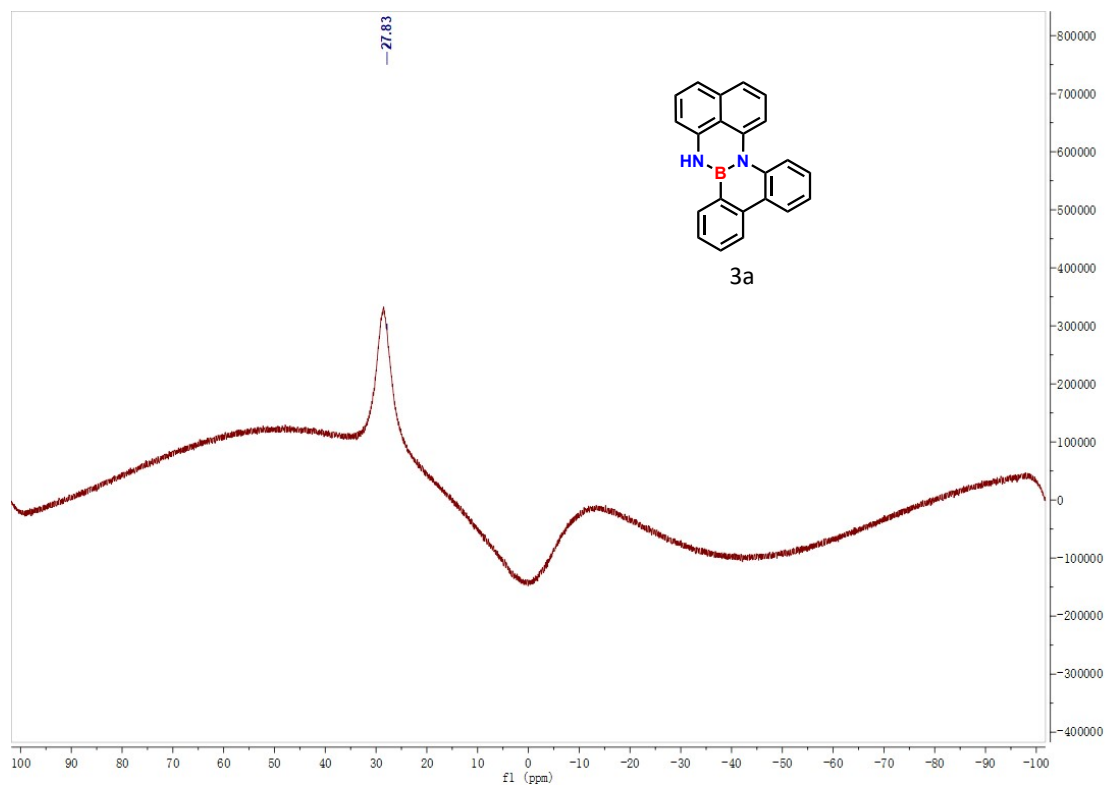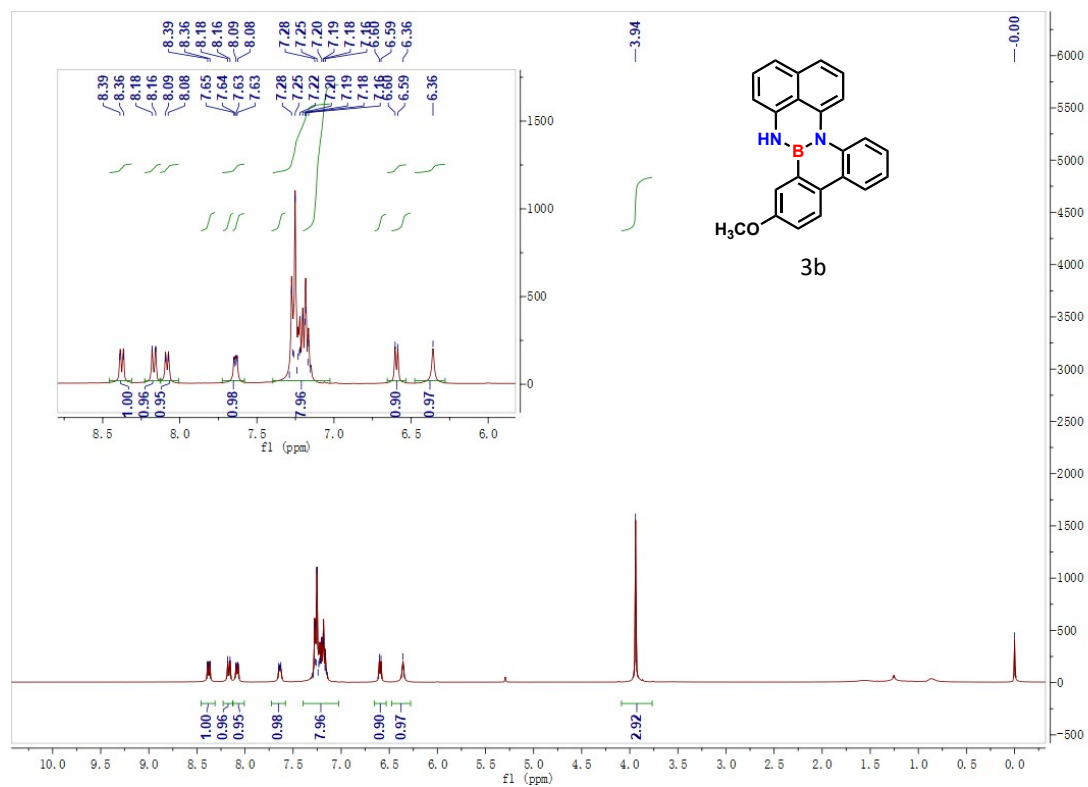

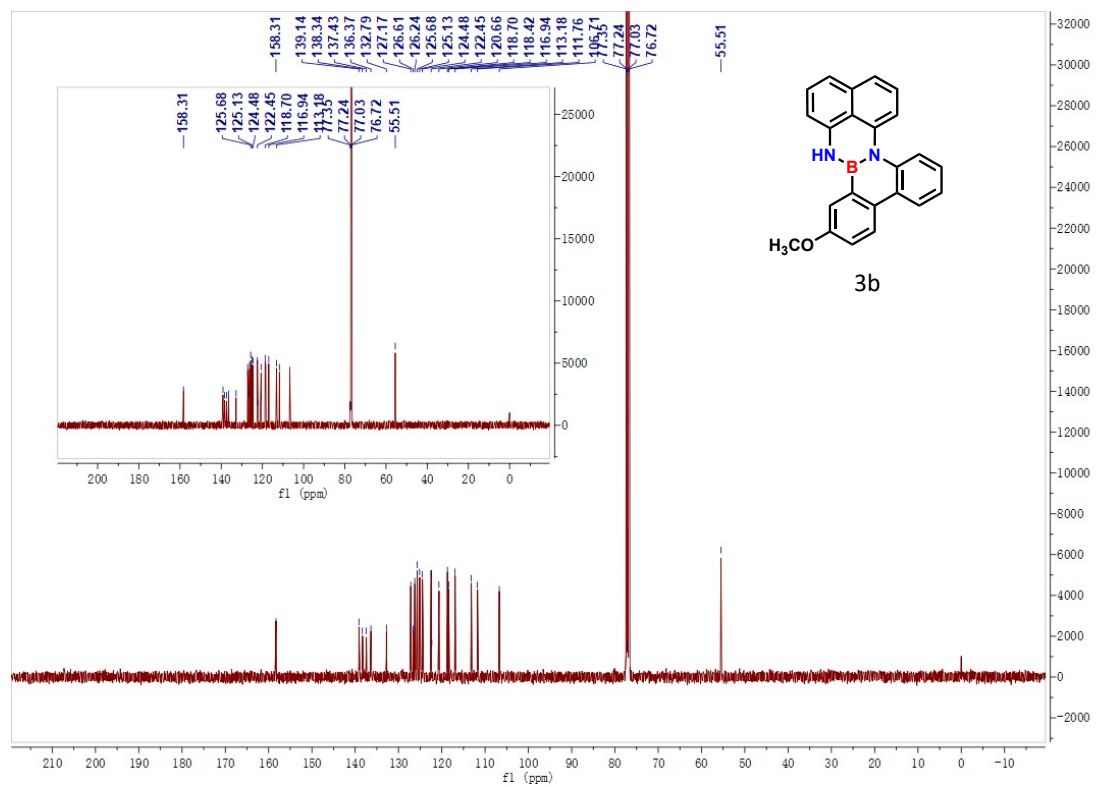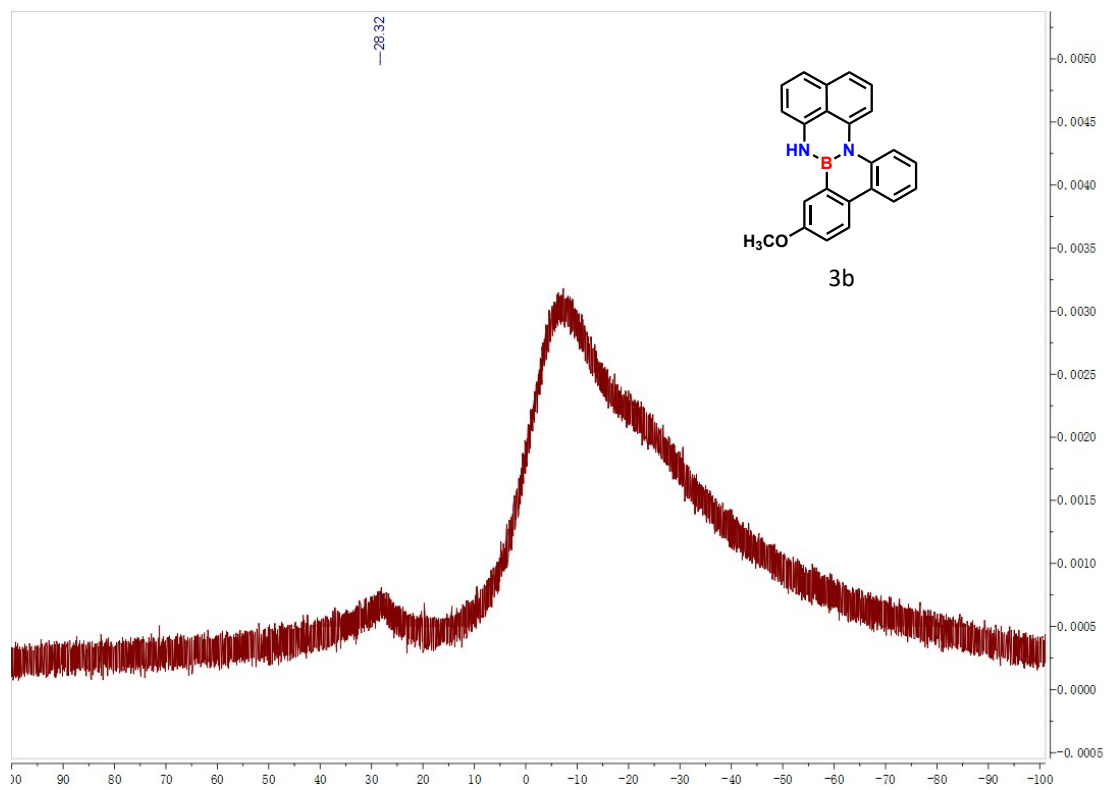



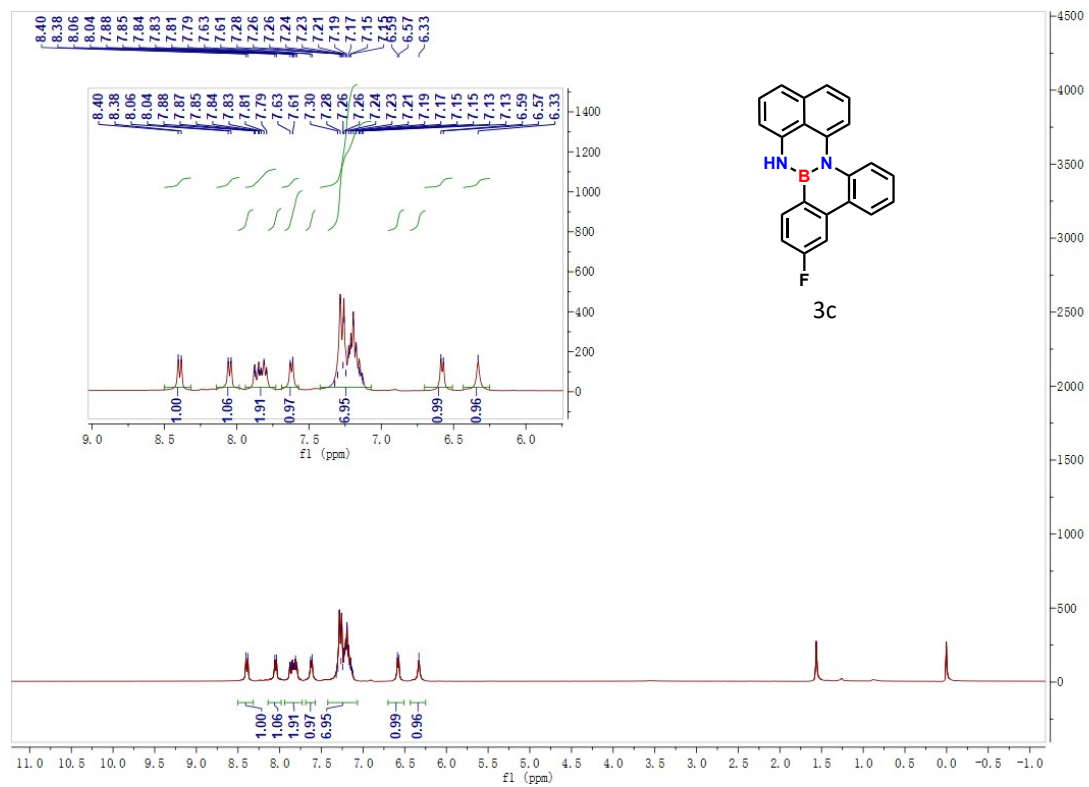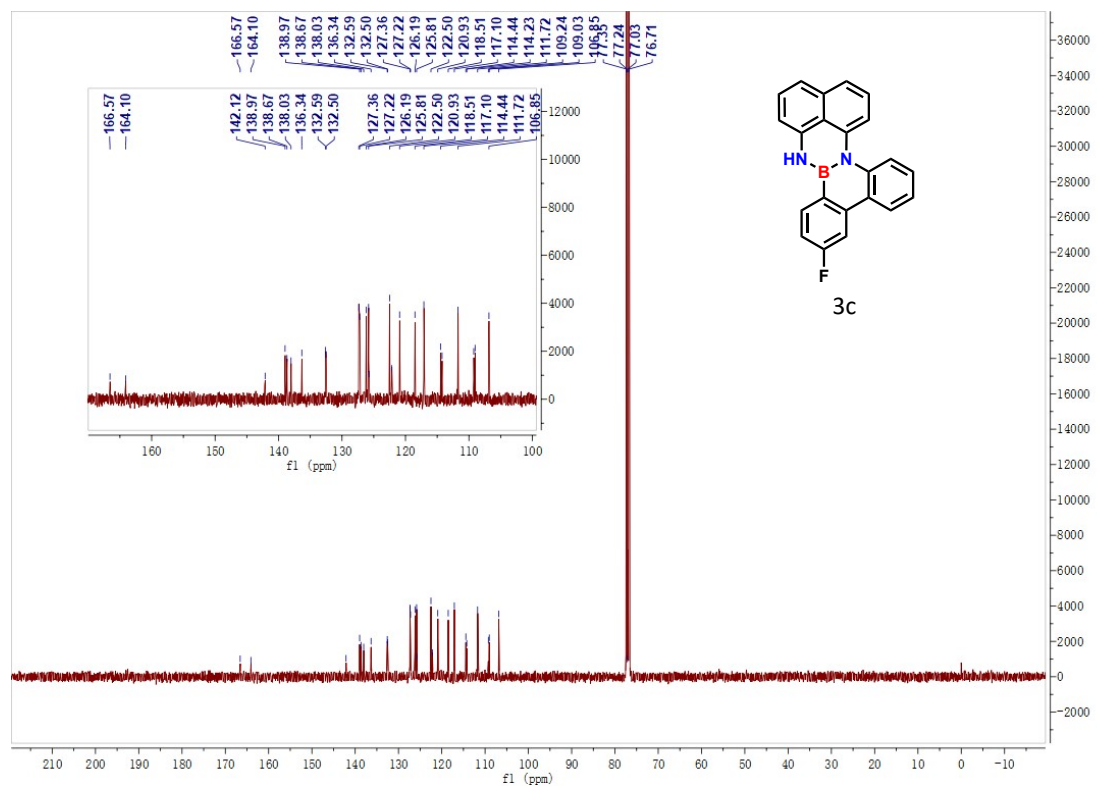

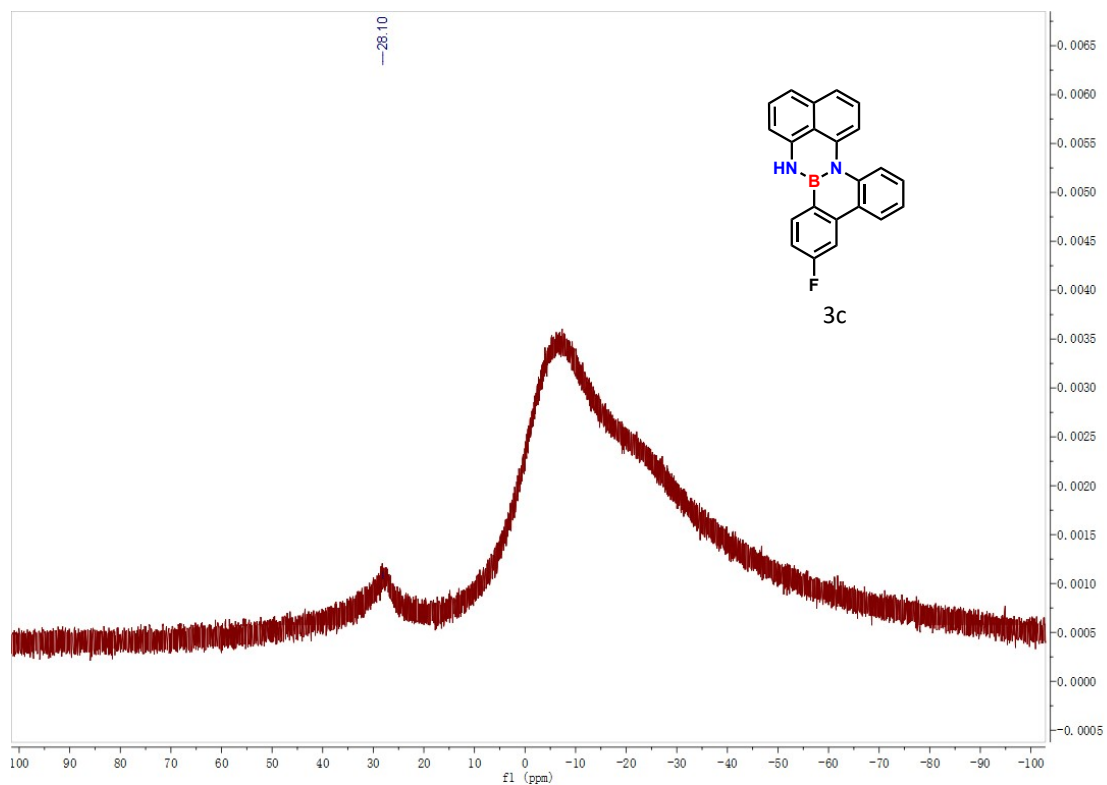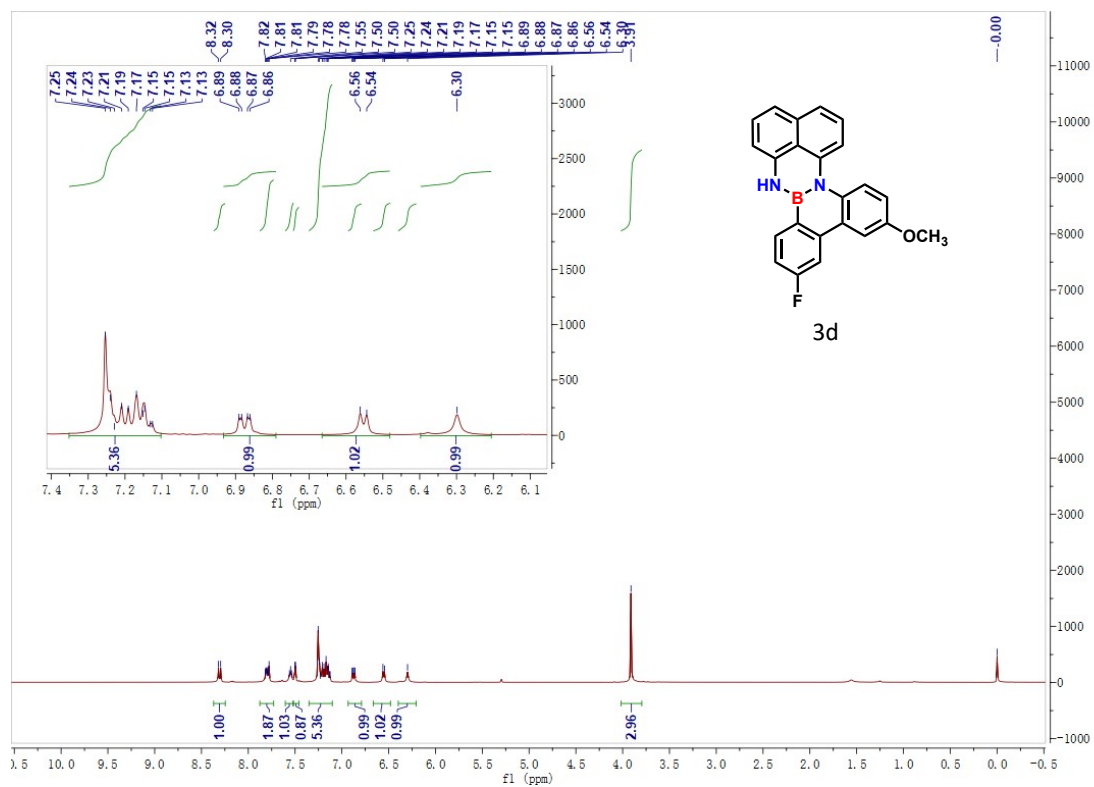

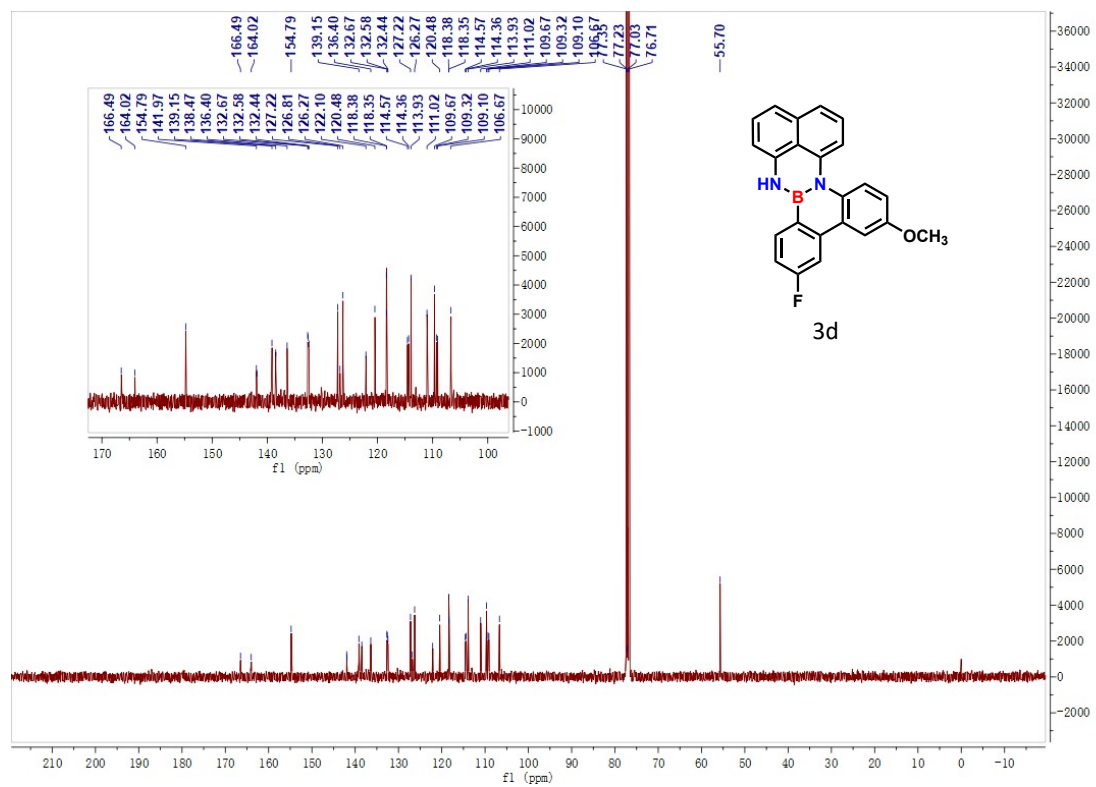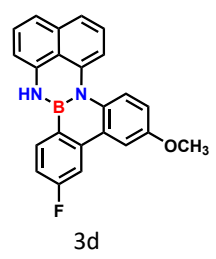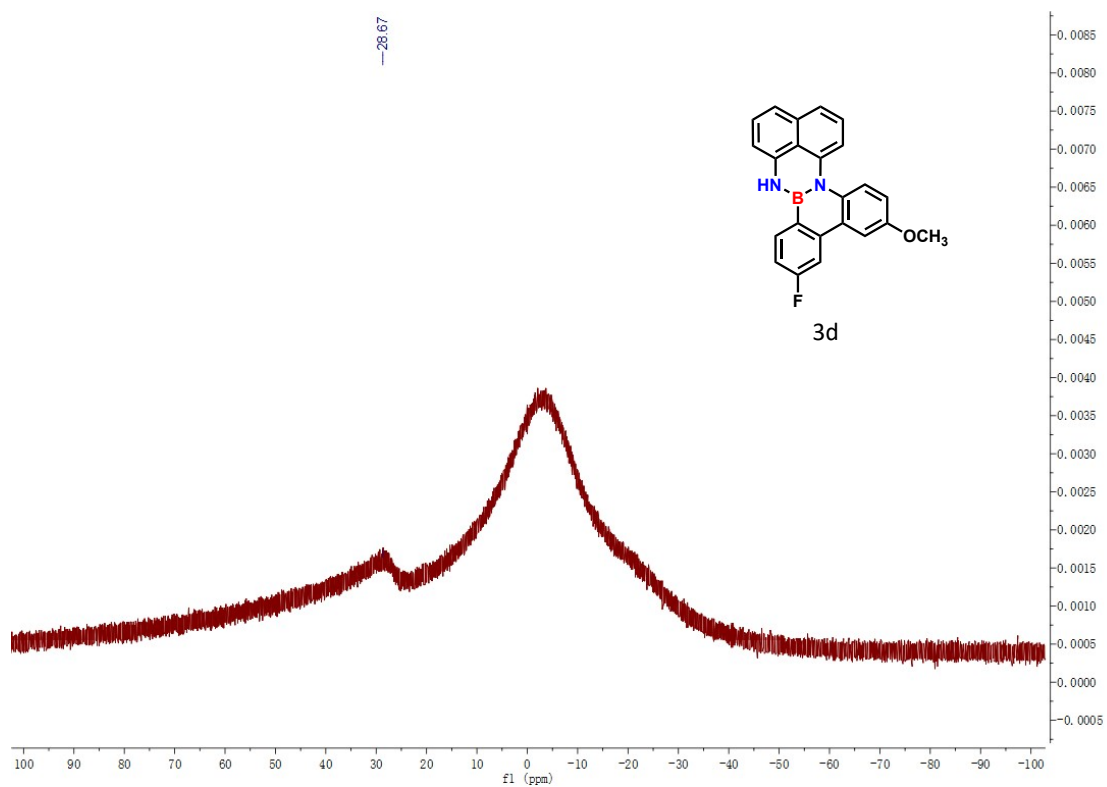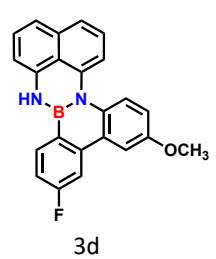

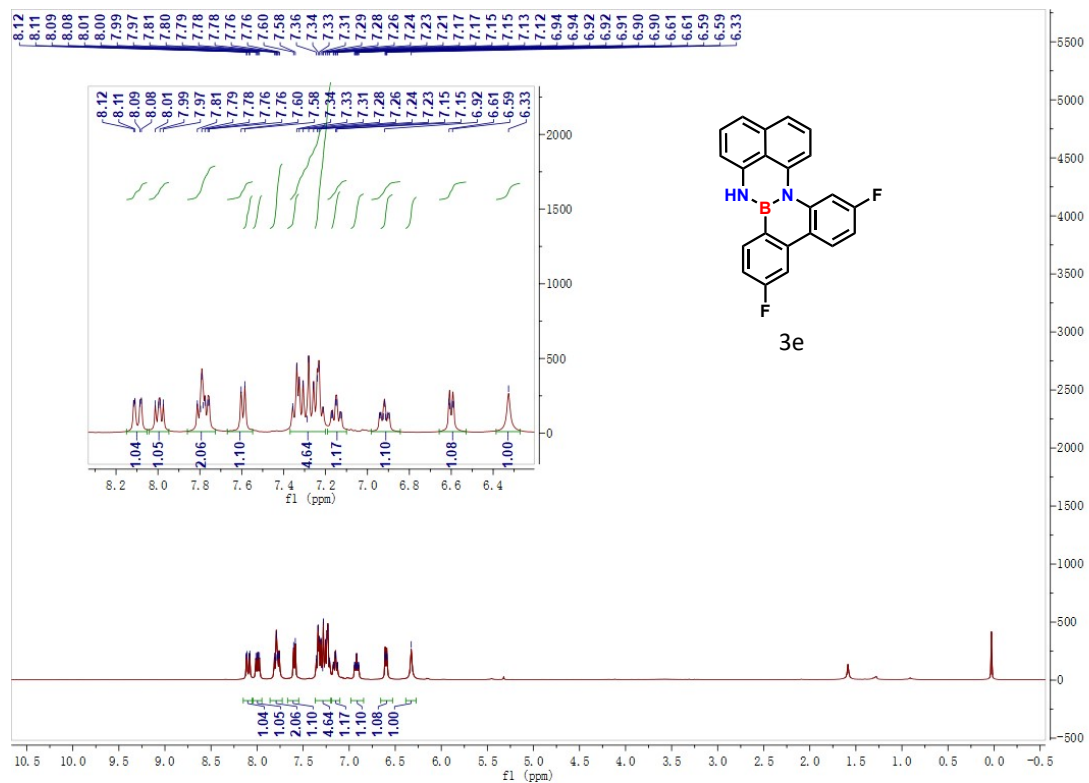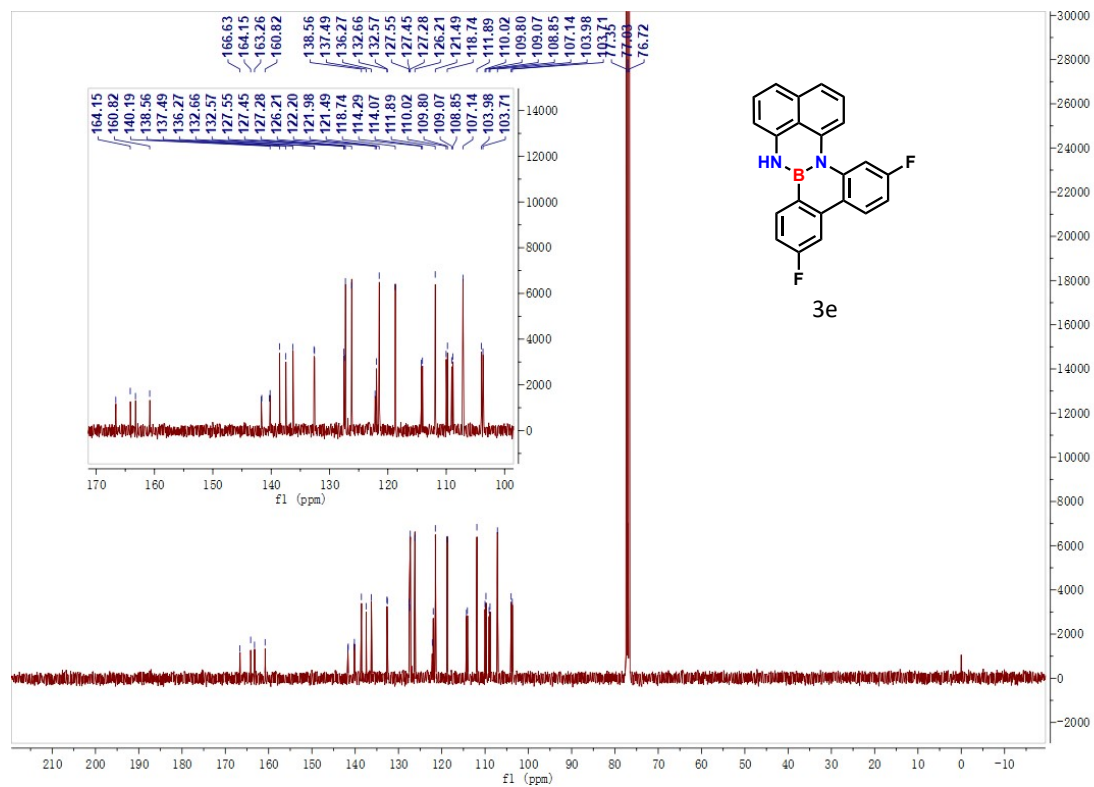

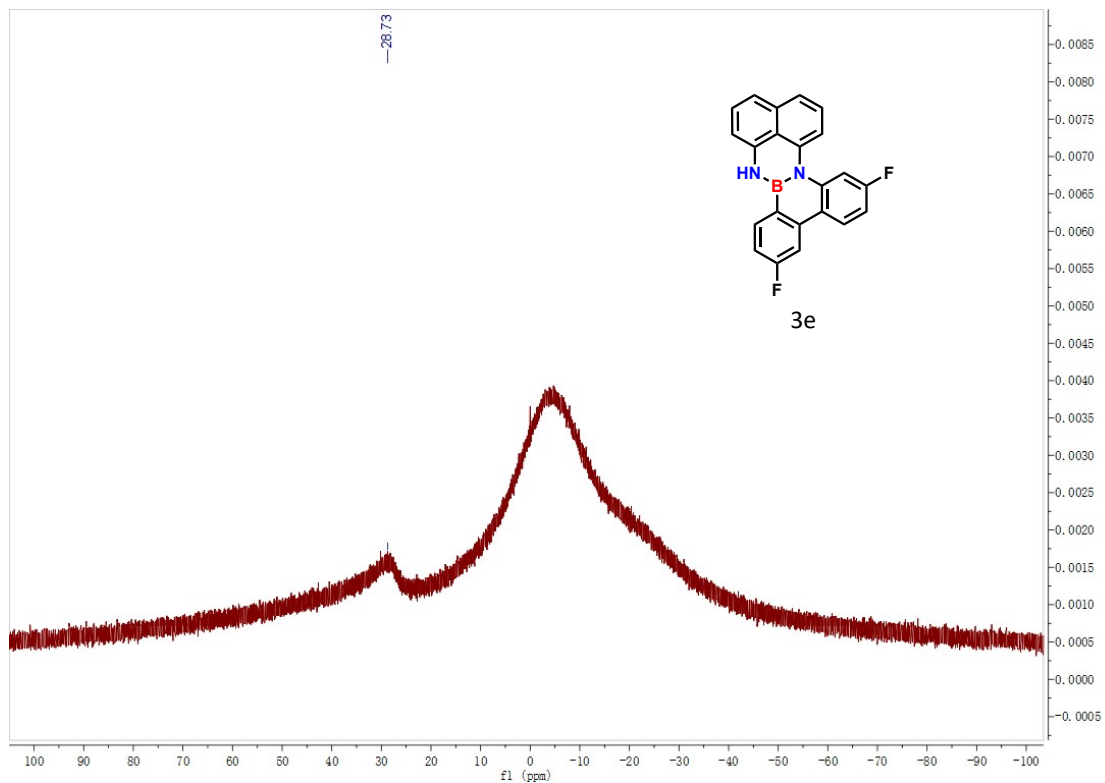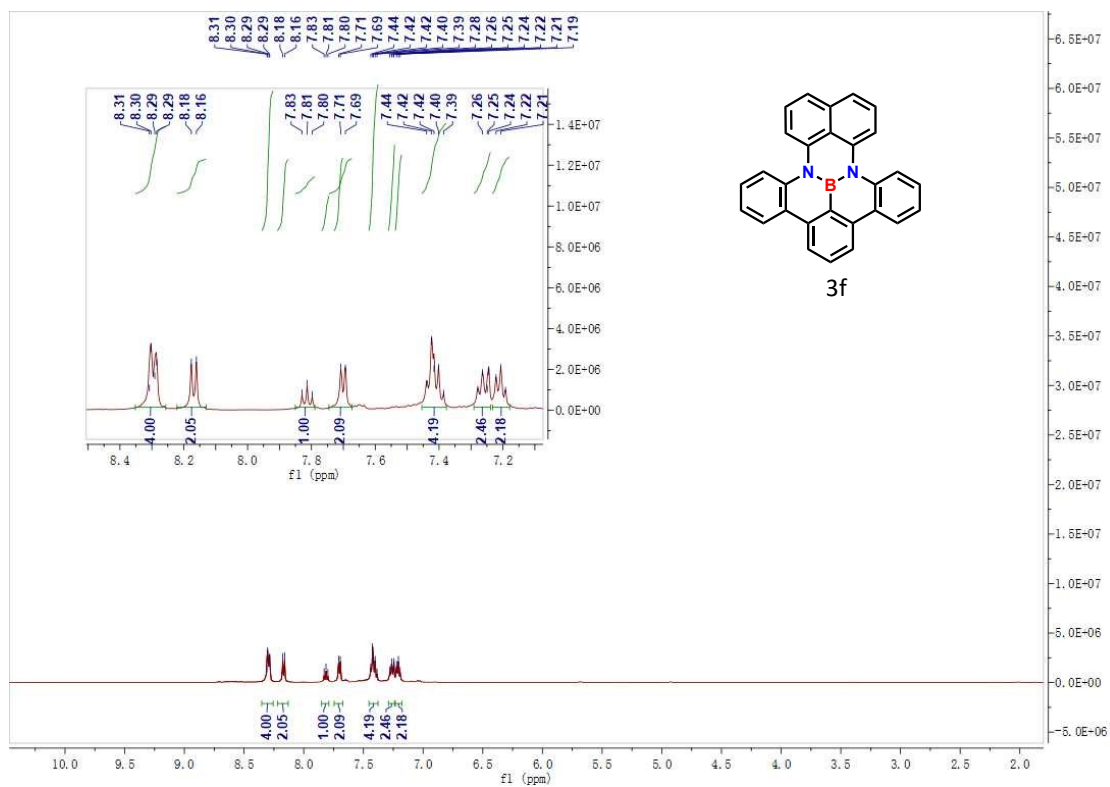

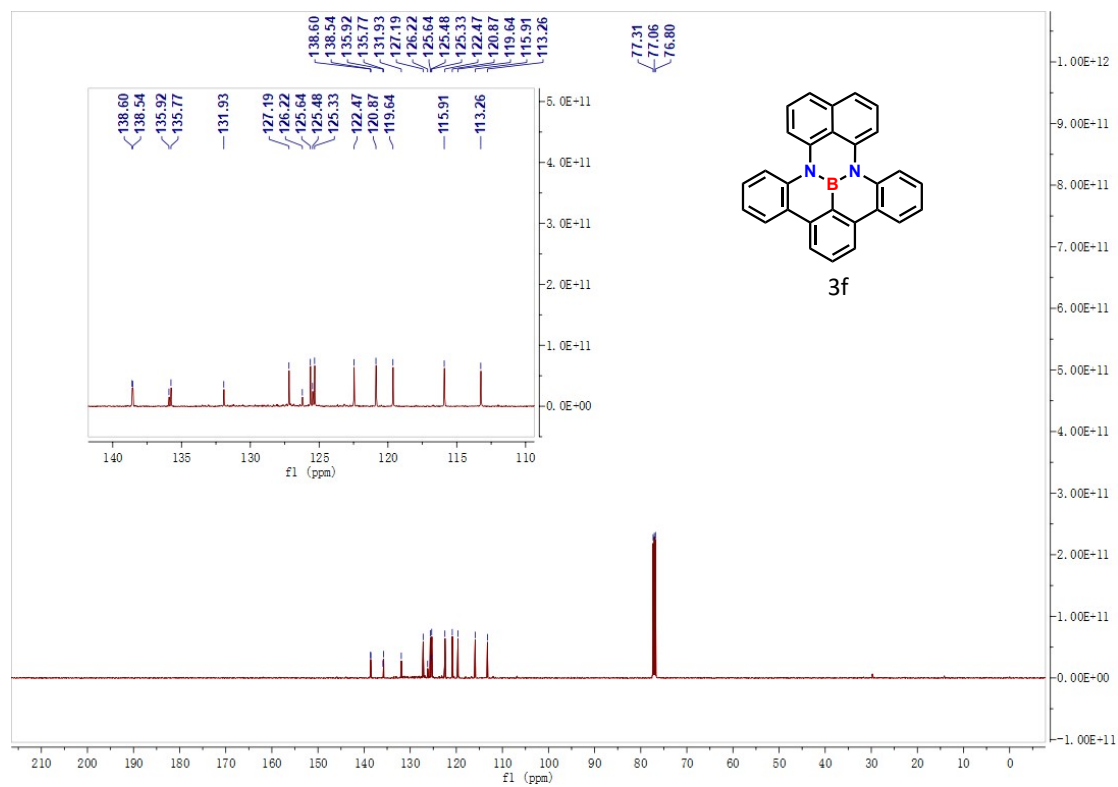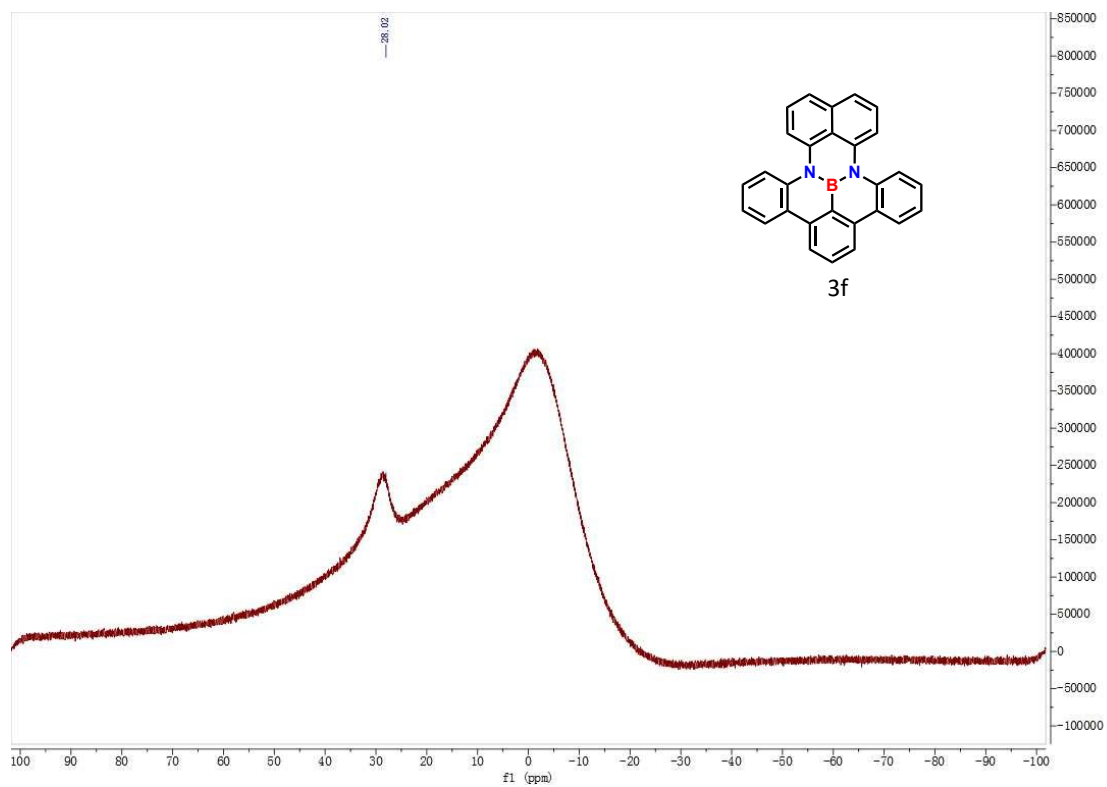

## Scanned mass spectrum for the New Compounds

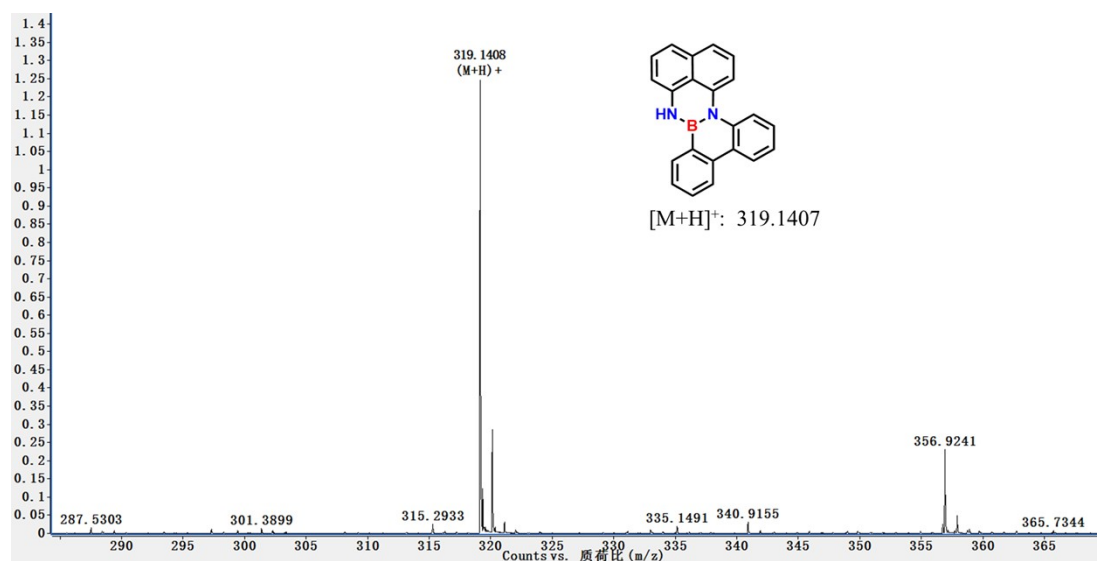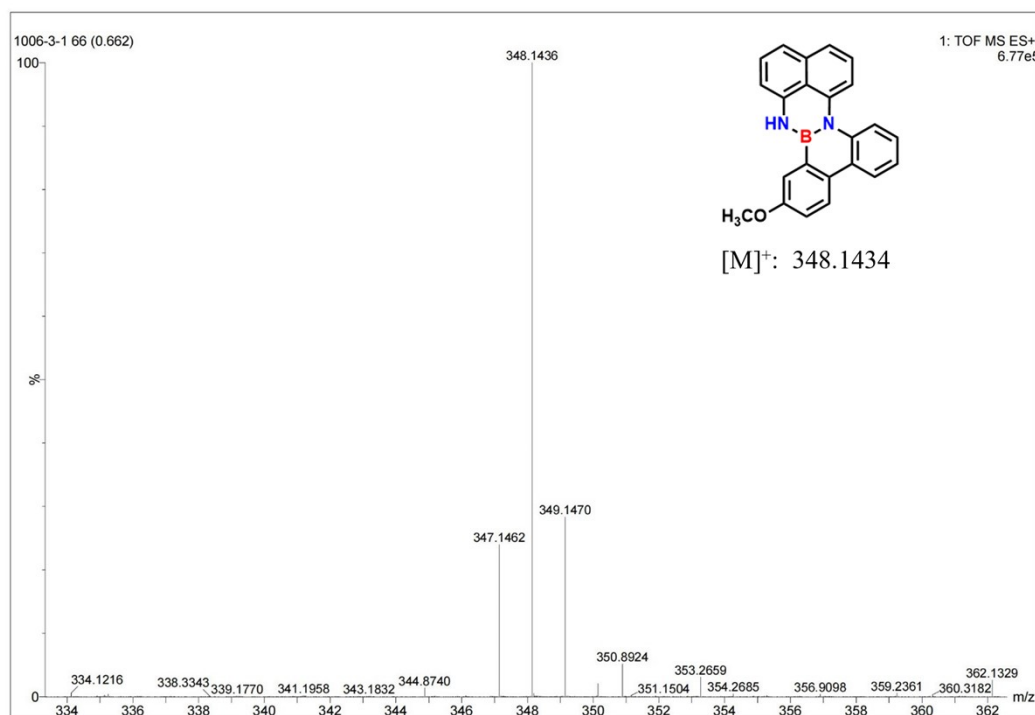

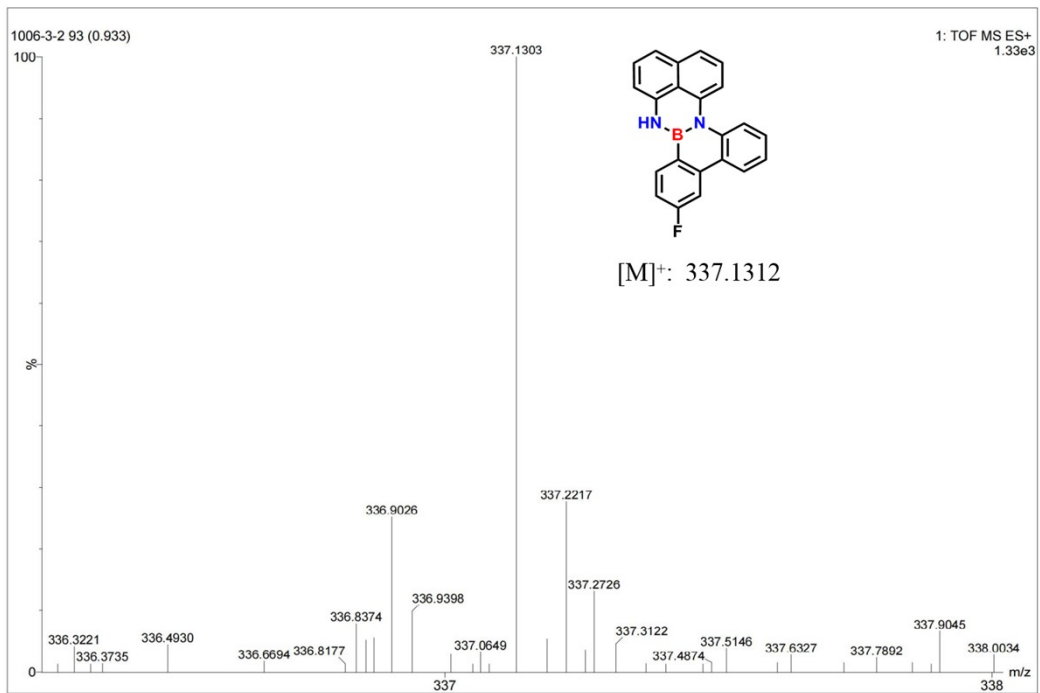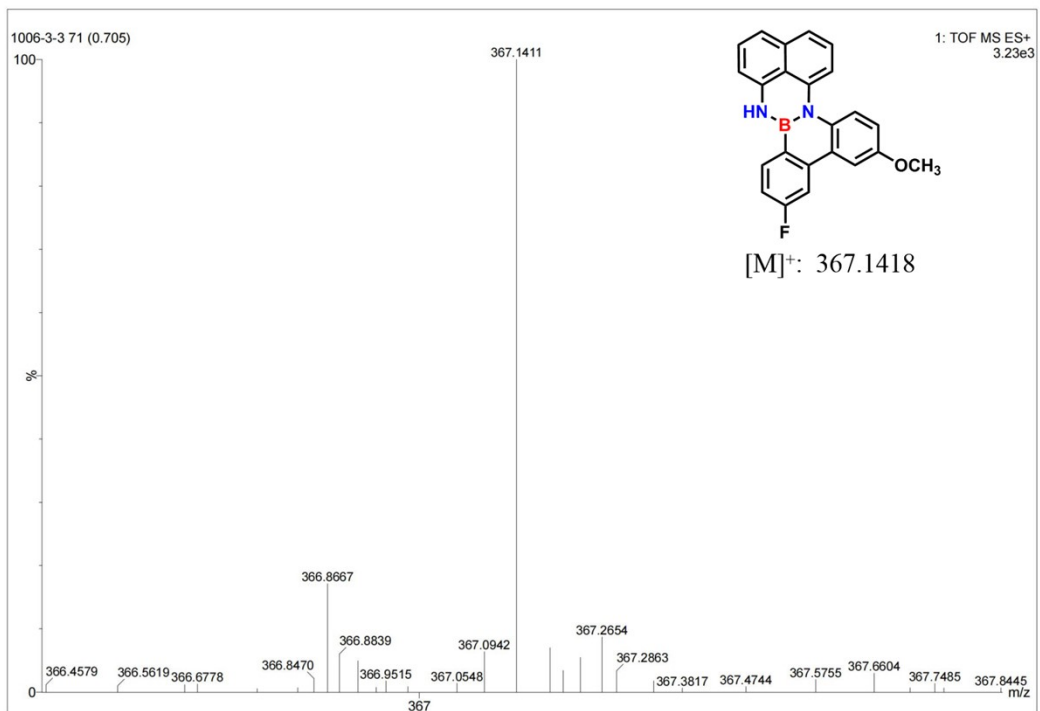



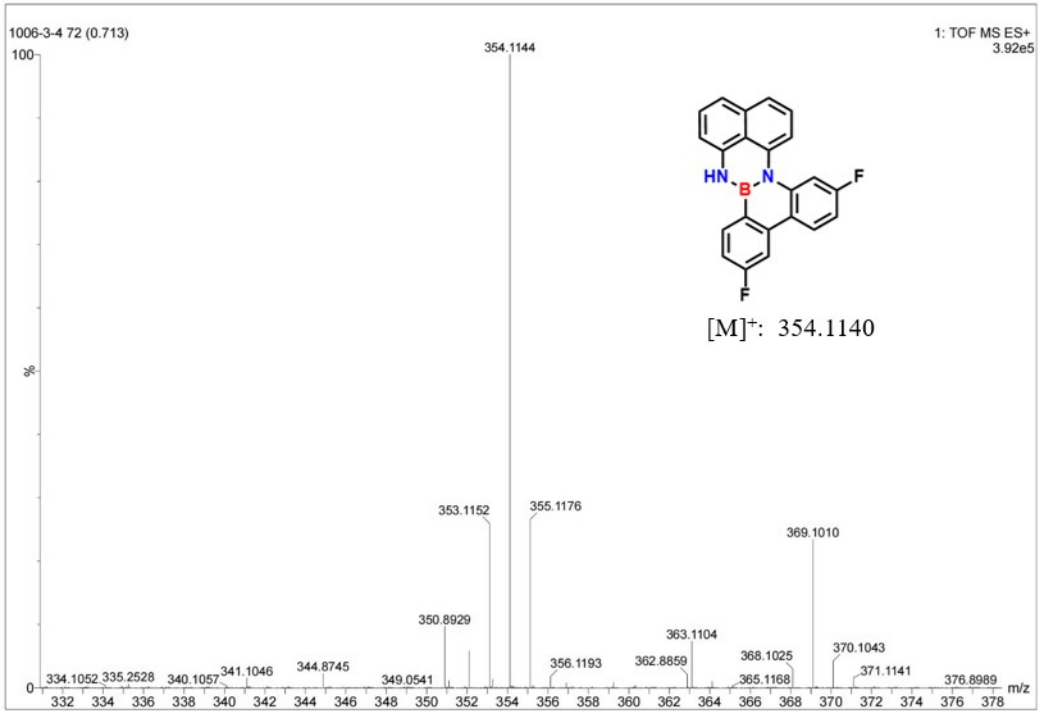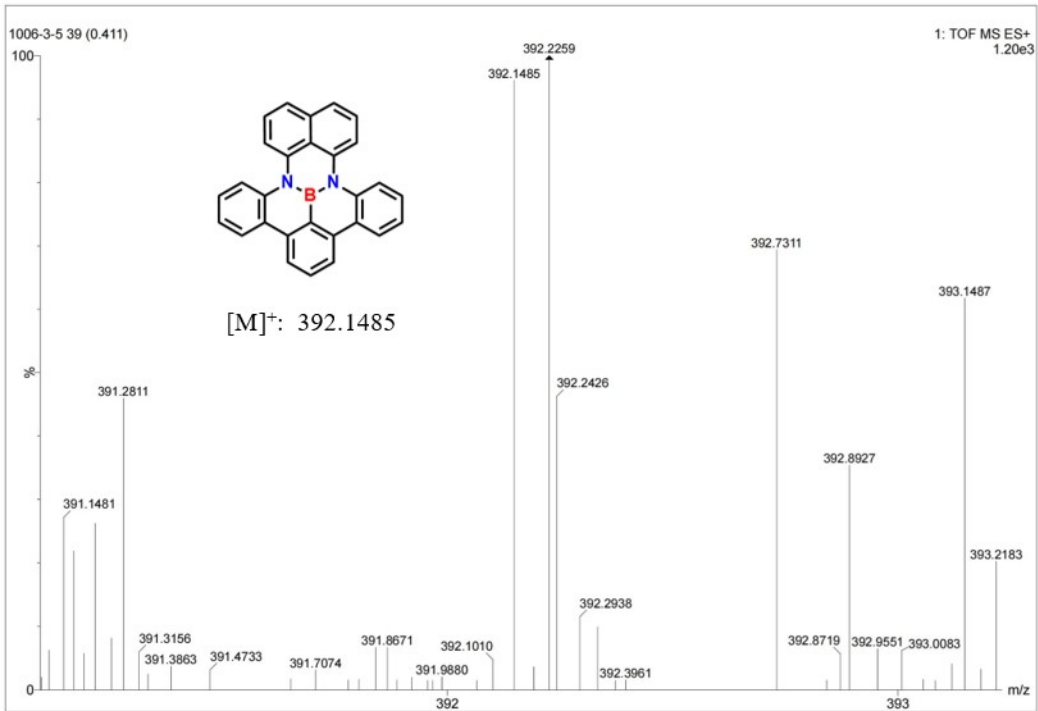

Supplement: d3qo01320k1.pdf [file d3qo01320k1.pdf]
